# Supplementary material for: Testosterone enhances mitochondrial complex V function in the substantia nigra of aged male rats
Source: publisher site journal article supplement (doi:10.18632/aging.103265), 2020-05-23
Supplement: Supplementary file [file aging-v12i11-103265-supplementary-material-SD1.pdf]

**SUPPLEMENTARY MATERIALS**

|              |                                             |     |  |
|--------------|---------------------------------------------|-----|--|
| ORIGIN       |                                             |     |  |
| 6Mon.seq     | ATGAACGAAAATCTATTTGCCTCTTTCATTAACCCCAAA     | 40  |  |
| 24Mon.seq    | ATGAACGAAAATCTATTTGCCTCTTTCATTAACCCCAAA     | 40  |  |
| 24Mon-TP.seq | ATGAACGAAAATCTATTTGCCTCTTTCATTAACCCCAAA     | 40  |  |
| Consensus    | atgaacgaaaatctat ttgcctctttcat ta ccccca aa |     |  |
| 6Mon.seq     | TAATAGGTCACCAATTGTTGTAAACCAATTAATGTTCCC     | 80  |  |
| 24Mon.seq    | TAATAGGTCACCAATTGTTGTAAACCAATTAATGTTCCC     | 80  |  |
| 24Mon-TP.seq | TAATAGGTCACCAATTGTTGTAAACCAATTAATGTTCCC     | 80  |  |
| Consensus    | ta atagg tctaccaattgtgtaa ccaattatgttccc    |     |  |
| 6Mon.seq     | ATCAATTCTATTTCCCATCATCAAAAAGCCTAATCAGCAAC   | 120 |  |
| 24Mon.seq    | ATCAATTCTATTTCCCATCATCAAAAAGCCTAATCAGCAAC   | 120 |  |
| 24Mon-TP.seq | ATCAATTCTATTTCCCATCATCAAAAAGCCTAATCAGCAAC   | 120 |  |
| Consensus    | atcaattctat tcccatcat caaaaagccta atcagcaac |     |  |
| 6Mon.seq     | CGACTACACTCATTCAACACTGACTAATCAAACCTTATCA    | 160 |  |
| 24Mon.seq    | CGACTACACTCATTCAACACTGACTAATCAAACCTTATCA    | 160 |  |
| 24Mon-TP.seq | CGACTACACTCATTCAACACTGACTAATCAAACCTTATCA    | 160 |  |
| Consensus    | cgactacactcatttcaacactgactaatcaaacctt atca  |     |  |
| 6Mon.seq     | TCAAACAATAATGTTAATCCACACCAAAAAGGACGAAC      | 200 |  |
| 24Mon.seq    | TCAAACAATAATGTTAATCCACACCAAAAAGGACGAAC      | 200 |  |
| 24Mon-TP.seq | TCAAACAATAATGTTAATCCACACCAAAAAGGACGAAC      | 200 |  |
| Consensus    | tcaaac aataatgtt aatccacac caaaaaggacgaac   |     |  |
| 6Mon.seq     | CTGAGCCCTAATAATGTATCCCTAATTAATTTATTTGGC     | 240 |  |
| 24Mon.seq    | CTGAGCCCTAATAATGTATCCCTAATTAATTTATTTGGC     | 240 |  |
| 24Mon-TP.seq | CTGAGCCCTAATAATGTATCCCTAATTAATTTATTTGGC     | 240 |  |
| Consensus    | ctgagccctaa taattgtatcccctaattatattttggc    |     |  |
| 6Mon.seq     | TCAACCAACCTTCTAGGGCTTCTTCCCATACATTTACCC     | 280 |  |
| 24Mon.seq    | TCAACCAACCTTCTAGGGCTTCTTCCCATACATTTACCC     | 280 |  |
| 24Mon-TP.seq | TCAACCAACCTTCTAGGGCTTCTTCCCATACATTTACCC     | 280 |  |
| Consensus    | tcaaaccaacctctagggttcttcccatacat ttacc      |     |  |
| 6Mon.seq     | CTACCACTCAGCTATCTATAAACCTAAGCATAGCCATCCC    | 320 |  |
| 24Mon.seq    | CTACCACTCAGCTATCTATAAACCTAAGCATAGCCATCCC    | 320 |  |
| 24Mon-TP.seq | CTACCACTCAGCTATCTATAAACCTAAGCATAGCCATCCC    | 320 |  |
| Consensus    | ctaccactcagcta tctataaacctaagcatagccatccc   |     |  |
| 6Mon.seq     | CCATATGAGCAGGAGCCGTAATTCTAGGCTTCGACACAAA    | 360 |  |
| 24Mon.seq    | CCATATGAGCAGGAGCCGTAATTCTAGGCTTCGACACAAA    | 360 |  |
| 24Mon-TP.seq | CCATATGAGCAGGAGCCGTAATTCTAGGCTTCGACACAAA    | 360 |  |
| Consensus    | cctatgagcaggagccgtaattctaggcttcgacacaaa     |     |  |
| 6Mon.seq     | CTAAAAAATCTTTAGCCACTTCTTACC GCAAGGAACCC     | 400 |  |
| 24Mon.seq    | CTAAAAAATCTTTAGCCACTTCTTACC GCAAGGAACCC     | 400 |  |
| 24Mon-TP.seq | CTAAAAAATCTTTAGCCACTTCTTACC GCAAGGAACCC     | 400 |  |
| Consensus    | ctaaaaaatcttt agccacttcttaccgcaaggaaacc     |     |  |
| 6Mon.seq     | CCATCTACTAATTC C CATACTAATCATCATCGAAACTAT   | 440 |  |
| 24Mon.seq    | CCATCTACTAATTC C CATACTAATCATCATCGAAACTAT   | 440 |  |
| 24Mon-TP.seq | CCATCTACTAATTC C CATACTAATCATCATCGAAACTAT   | 440 |  |
| Consensus    | ccatctactaattcccatactaatcatcatcgaaactat     |     |  |
| 6Mon.seq     | CAGCCTATTTATTC AACCGATAGCAGTAGCAGTACGACTA   | 480 |  |
| 24Mon.seq    | CAGCCTATTTATTC AACCGATAGCAGTAGCAGTACGACTA   | 480 |  |
| 24Mon-TP.seq | CAGCCTATTTATTC AACCGATAGCAGTAGCAGTACGACTA   | 480 |  |
| Consensus    | cagcctatttattcaaccgatagcactagcagtagcagacta  |     |  |
| 6Mon.seq     | ACAGCAAACATTAACAGCAGGCCATCTATTAATGCATCTAA   | 520 |  |
| 24Mon.seq    | ACAGCAAACATTAACAGCAGGCCATCTATTAATGCATCTAA   | 520 |  |
| 24Mon-TP.seq | ACAGCAAACATTAACAGCAGGCCATCTATTAATGCATCTAA   | 520 |  |
| Consensus    | acagcaaacat tacagaggccatctattaatgcatctaa    |     |  |
| 6Mon.seq     | TCGGAGGAGCTACTTAGTACTTATAGACATCAGCCACC      | 560 |  |
| 24Mon.seq    | TCGGAGGAGCTACTTAGTACTTATAGACATCAGCCACC      | 560 |  |
| 24Mon-TP.seq | TCGGAGGAGCTACTTAGTACTTATAGACATCAGCCACC      | 560 |  |
| Consensus    | t cggaggagctactctagtactt atagacatcagccacc   |     |  |
| 6Mon.seq     | AA CCGCTACAATTACATTTAATTTACTACTTACTTACA     | 600 |  |
| 24Mon.seq    | AA CCGCTACAATTACATTTAATTTACTACTTACTTACA     | 600 |  |
| 24Mon-TP.seq | AA CCGCTACAATTACATTTAATTTACTACTTACTTACA     | 600 |  |
| Consensus    | aaccgctacaattacat tttat tttactacttctacttaca |     |  |
| 6Mon.seq     | GTACTTGAATTTGCCGTAGCCTTAATCAAGCCTATGTAT     | 640 |  |
| 24Mon.seq    | GTACTTGAATTTGCCGTAGCCTTAATCAAGCCTATGTAT     | 640 |  |
| 24Mon-TP.seq | GTACTTGAATTTGCCGTAGCCTTAATCAAGCCTATGTAT     | 640 |  |
| Consensus    | gtacttgaatttgcgtagccttaattcaagcctatgtat     |     |  |
| 6Mon.seq     | TCACCCTTCTAGTAAGCCTGTACCTACATGATAACACATA    | 680 |  |
| 24Mon.seq    | TCACCCTTCTAGTAAGCCTGTACCTACATGATAACACATA    | 680 |  |
| 24Mon-TP.seq | TCACCCTTCTAGTAAGCCTGTACCTACATGATAACACATA    | 680 |  |
| Consensus    | tcaaccttctagtaagcctgtacctacatgataaacacata   |     |  |
| 6Mon.seq     | A                                           | 681 |  |
| 24Mon.seq    | A                                           | 681 |  |
| 24Mon-TP.seq | A                                           | 681 |  |
| Consensus    | a                                           |     |  |

**Supplementary Material 1. Comparison of ATP6 DNA sequences in the substantia nigra among 6Mon, 24Mon and 24Mon-TP rats. Identity=100%. (n=3 rats/group).**

|              |                                           |     |  |
|--------------|-------------------------------------------|-----|--|
| ORIGIN       |                                           |     |  |
| 6Mon.seq     | ATGCCACAAC TAGACACATCCACATGATTTATTACAATCA | 40  |  |
| 24Mon.seq    | ATGCCACAAC TAGACACATCCACATGATTTATTACAATCA | 40  |  |
| 24Mon-TP.seq | ATGCCACAAC TAGACACATCCACATGATTTATTACAATCA | 40  |  |
| Consensus    | atgccacaactagacacatccacatgattattacaatca   |     |  |
| 6Mon.seq     | TCTCTCAATAGCCACACTATTTATTTTATTTCAATTAAA   | 80  |  |
| 24Mon.seq    | TCTCTCAATAGCCACACTATTTATTTTATTTCAATTAAA   | 80  |  |
| 24Mon-TP.seq | TCTCTCAATAGCCACACTATTTATTTTATTTCAATTAAA   | 80  |  |
| Consensus    | tctcctcaatagccacactatttattttatttcaataaa   |     |  |
| 6Mon.seq     | AATTTCTTCCAAAACCTTTCCTGCACCTCCCTCACCCAAA  | 120 |  |
| 24Mon.seq    | AATTTCTTCCAAAACCTTTCCTGCACCTCCCTCACCCAAA  | 120 |  |
| 24Mon-TP.seq | AATTTCTTCCAAAACCTTTCCTGCACCTCCCTCACCCAAA  | 120 |  |
| Consensus    | aatttcttccaaaaccttctcctgcacctcctcacccaaa  |     |  |
| 6Mon.seq     | ACTATAGCTACAGAAAAACGAATAACCCCTTGAGAAATCAA | 160 |  |
| 24Mon.seq    | ACTATAGCTACAGAAAAACGAATAACCCCTTGAGAAATCAA | 160 |  |
| 24Mon-TP.seq | ACTATAGCTACAGAAAAACGAATAACCCCTTGAGAAATCAA | 160 |  |
| Consensus    | actatagctacagaaaaacgaataaaccttgagaatcaa   |     |  |
| 6Mon.seq     | AATGAACGAAAATCTATTTGCCTCTTTCATTACCCCCACA  | 200 |  |
| 24Mon.seq    | AATGAACGAAAATCTATTTGCCTCTTTCATTACCCCCACA  | 200 |  |
| 24Mon-TP.seq | AATGAACGAAAATCTATTTGCCTCTTTCATTACCCCCACA  | 200 |  |
| Consensus    | aatgaacgaaaatctatttgcctctttcattacccccaca  |     |  |
| 6Mon.seq     | ATAA                                      | 204 |  |
| 24Mon.seq    | ATAA                                      | 204 |  |
| 24Mon-TP.seq | ATAA                                      | 204 |  |
| Consensus    | ataa                                      |     |  |

**Supplementary Material 2. Comparison of ATP8 DNA sequences in the substantia nigra among 6Mon, 24Mon and 24Mon-TP rats. Identity=100%. (n=3 rats/group).**
